# Supplementary material
Source: PubMed Central journal article supplement (PMC9691787)
Supplement: NIHMS1816021-supplement-5.pdf [file NIHMS1816021-supplement-5.pdf]

**A**

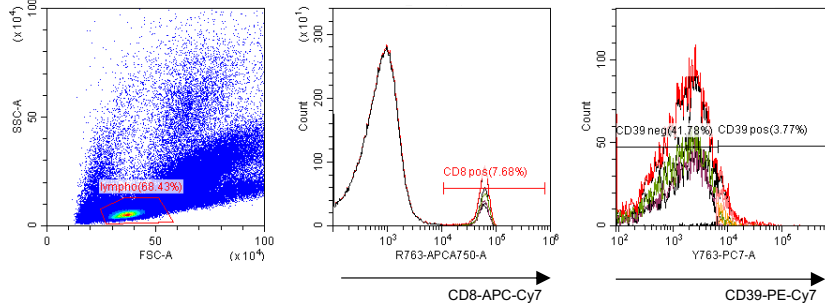

**B**

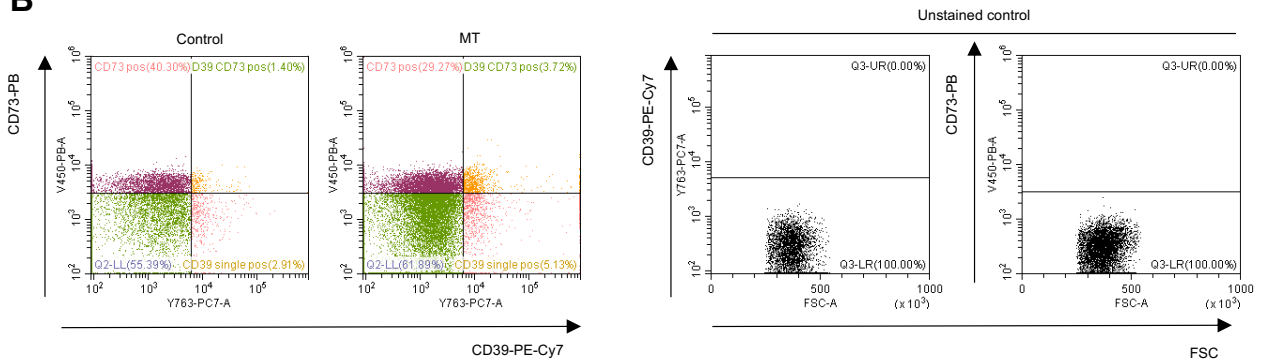

**C**

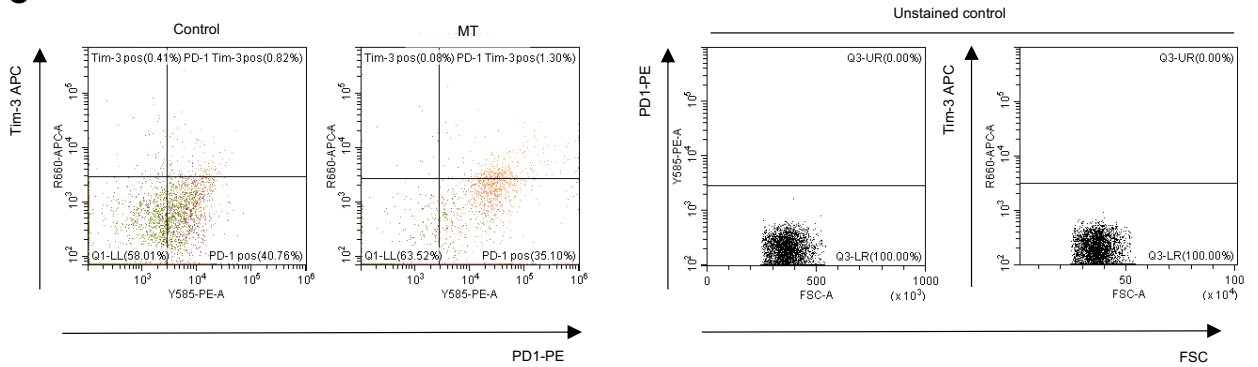

**D**

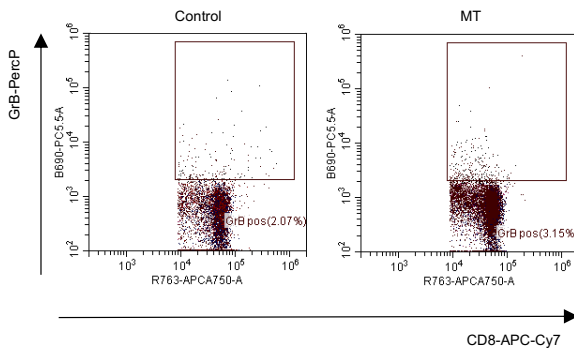

**E**

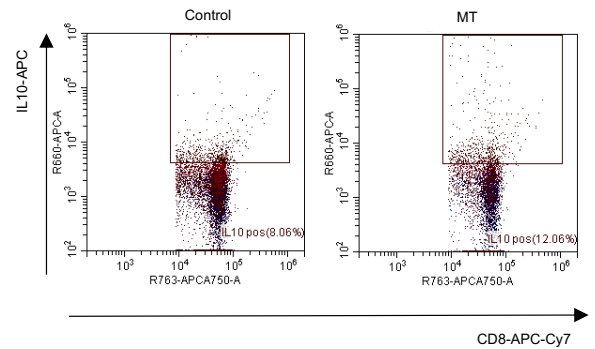

**A**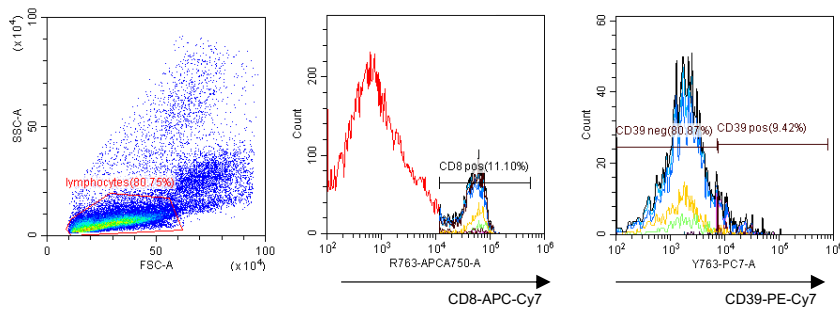**B**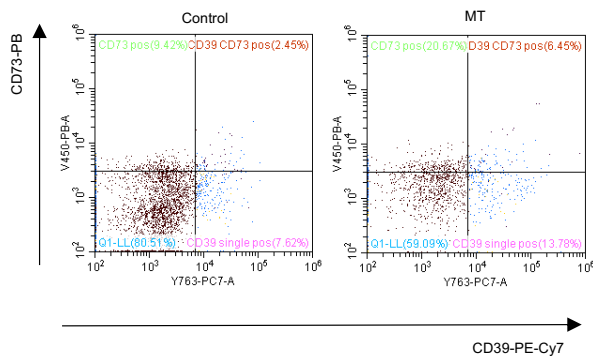**C**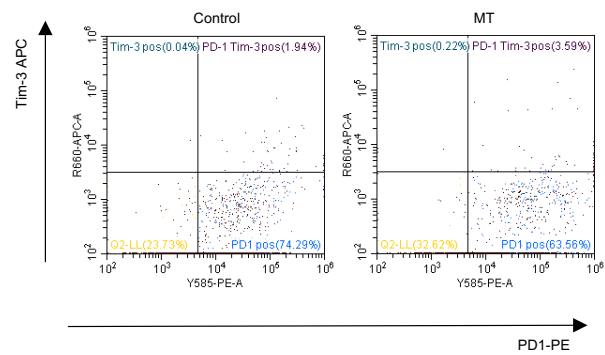**D**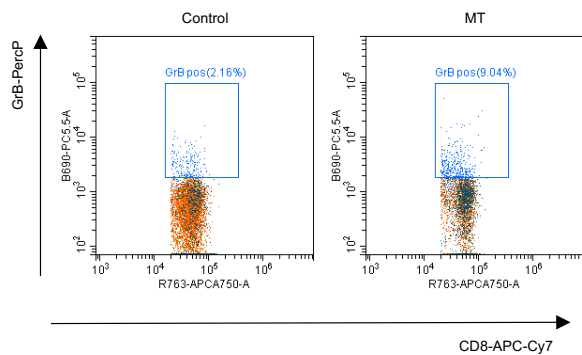**E**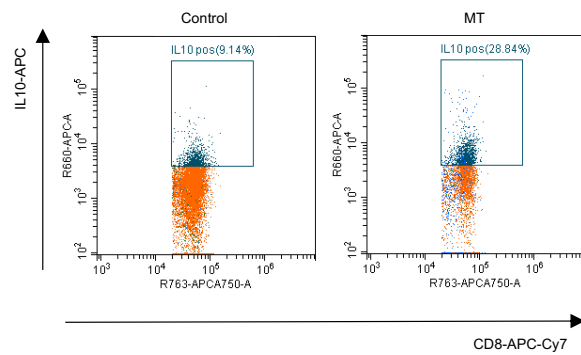

**A**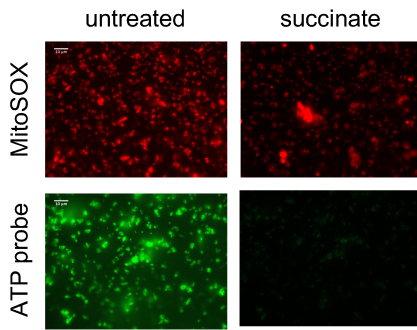**B**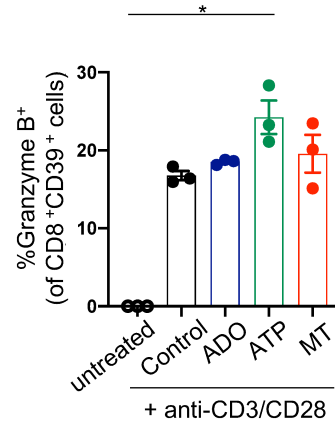**C**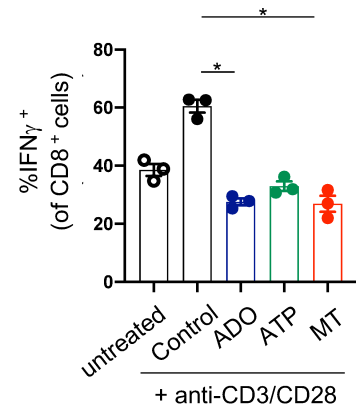**D**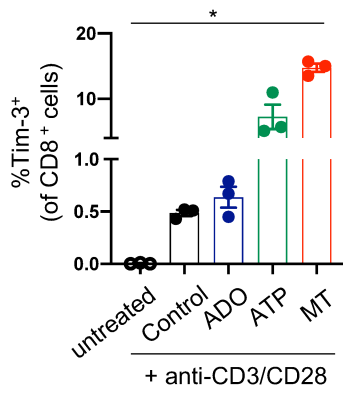**E**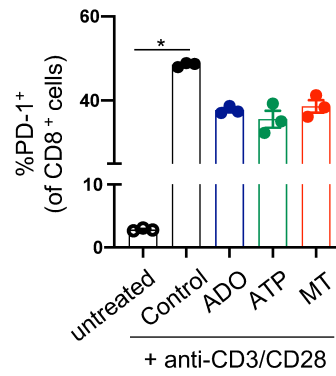**F**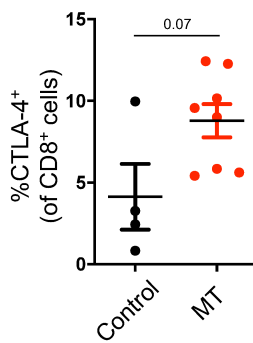

**A**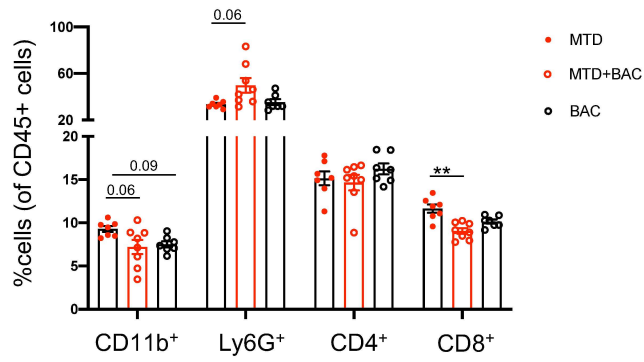**B**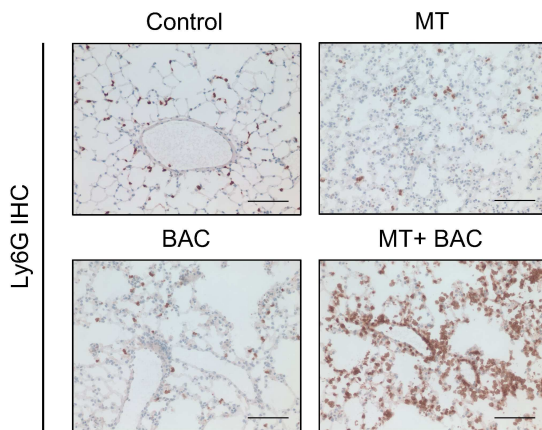**C**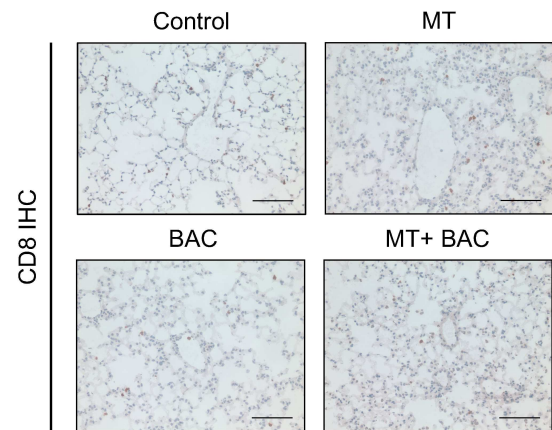

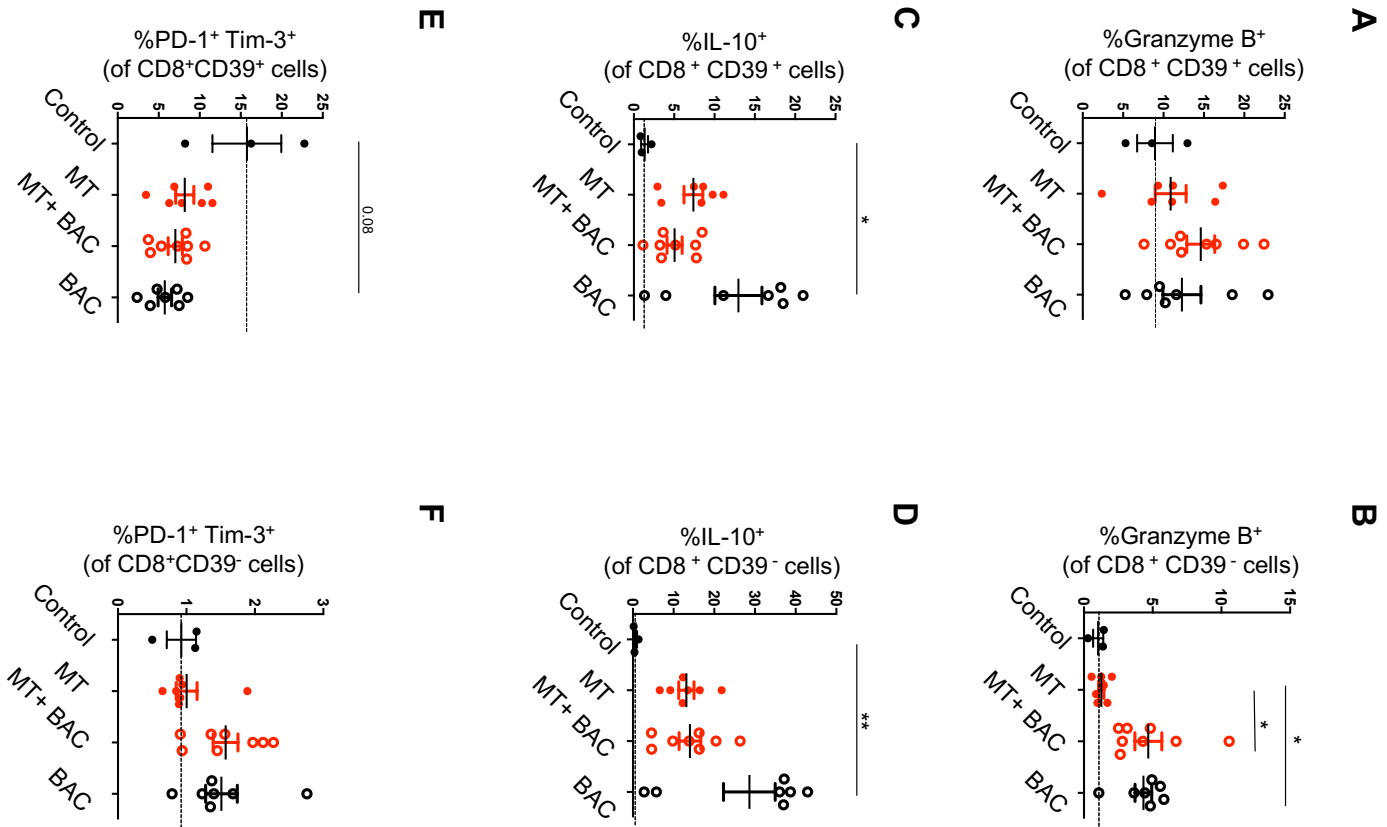

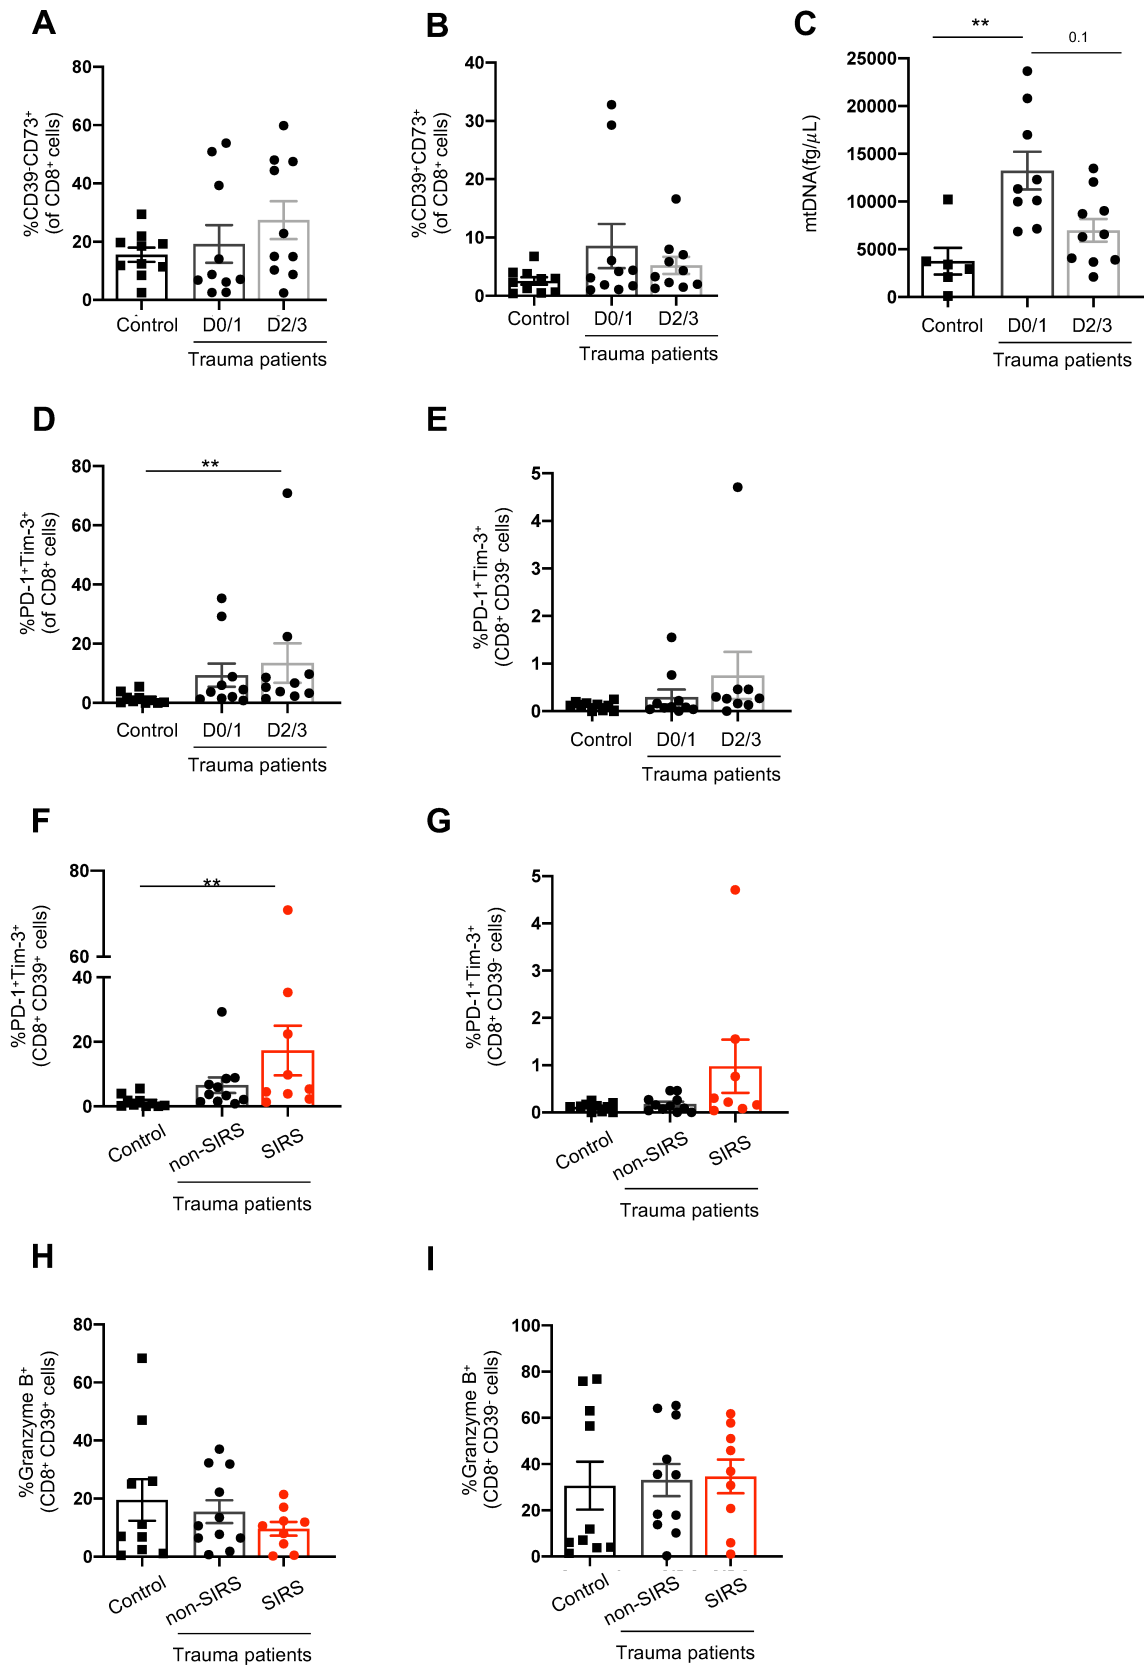

**Supplementary Table 1. Demographic and clinical data of trauma patients.**

| Gender | Mechanism of injury    | Injured body system                                             | ISS Score | Hospitalization (days) | ICU length (days) | Requiring ICU treatment | Requiring mechanical ventilation |
|--------|------------------------|-----------------------------------------------------------------|-----------|------------------------|-------------------|-------------------------|----------------------------------|
| Male   | Motor vehicle accident | Head/Brain, Lung/ Chest Wall                                    | 25        | 5                      | 0.7               | Yes                     | No                               |
| Male   | Fall                   | Spine                                                           | 6         | 3                      | 1.4               | Yes                     | Yes                              |
| Male   | Fall                   | Abdominal                                                       | 17        | 3                      | 1.1               | Yes                     | No                               |
| Male   | Motor vehicle accident | Spine, Lung/ Chest Wall, Pelvis / Extremities Injury            | 17        | 5                      | 0.7               | Yes                     | Yes                              |
| Male   | Motor vehicle accident | Lung/ Chest Wall, Pelvis / Extremities Injury                   | 13        | 10                     | 0                 | No                      | No                               |
| Male   | Stab wound             | Lung/ Chest Wall                                                | 10        | 5                      | 0.38              | Yes                     | No                               |
| Male   | Gunshot wound          | Pelvis / Extremities Injury                                     | 10        | 8                      | 0                 | No                      | No                               |
| Male   | Motor vehicle accident | Spine, Lung/ Chest Wall, Abdominal, Pelvis / Extremities Injury | 24        | 23                     | 13.8              | Yes                     | Yes                              |
| Male   | Motor vehicle accident | Head/Brain, Lung/ Chest Wall, Abdominal                         | 22        | 7                      | 1.79              | Yes                     | Yes                              |
| Male   | Fall                   | Head/Brain, Lung/ Chest Wall, Abdominal                         | 21        | 10                     | 3.39              | Yes                     | Yes                              |
| Male   | Motor vehicle accident | Head/Brain                                                      | 75        | 3                      | 1.69              | Yes                     | Yes                              |

**Supplementary Table 2. Demographic and clinical data of control patients.**

| Gender | Hospitalization (days) | ICU length (days) | Requiring ICU treatment | Requiring mechanical ventilation |
|--------|------------------------|-------------------|-------------------------|----------------------------------|
| Male   | 4                      | 0                 | No                      | Yes                              |
| Female | 2                      | 0                 | No                      | Yes                              |
| Female | 6                      | 1.3               | Yes                     | Yes                              |
| Male   | 3                      | 0                 | No                      | Yes                              |
| Female | 8                      | 0                 | No                      | Yes                              |
| Male   | 1                      | 0                 | No                      | Yes                              |
| Male   | 8                      | 0                 | No                      | Yes                              |
| Male   | 5                      | 1.2               | Yes                     | Yes                              |
| Male   | 2                      | 0                 | No                      | Yes                              |
| Male   | 7                      | 0                 | No                      | Yes                              |



## SUPPLEMENTARY MATERIALS

### Supplementary Materials: Flow cytometry Antibodies.

Human studies: Anti-human CD8 APC/Cy7 (Clone SK1), anti-human CD39 FITC (Clone A1), anti-human CD73 APC (Clone AD2), anti-human CD279 (PD-1) Pacific Blue (Clone EH12.2H7), anti-human Tim-3 PE (Clone F38,2E2), anti-human CD152 (CTLA4) PE (Clone L3D10), anti-human CD45-RO PE/Cy7 (CloneUCHL1), anti-human Granzyme B APC (Clone QA16A02), anti-human IFN $\gamma$  FITC (Clone 4S.B3), anti-human IL10 APC (Clone JES3-19F1), anti-human CD39-PE/Cy7 (Clone A1), anti-human CD73-PE (Clone AD2). All antibodies were from Biolegend, San Diego, CA); mouse studies: anti-mouse CD8a-APC/Cy7 (Clone: 53-6.7, Biolegend, San Diego, CA), anti-mouse CD39 PE/Cy7 (Clone 24DMS1, eBioscience, San Diego, CA), anti-mouse CD73-Pacific Blue (Clone TY/11.8, eBioscience, San Diego, CA), anti-mouse PD-1 PE (Clone 243, eBioscience, San Diego, CA), anti-mouse Tim-3 APC (Clone RMT3-23, Biolegend, San Diego, CA), anti-mouse CD152-BV605 (Clone UC10-4B9, Biolegend, San Diego, CA), anti-mouse CD44 APC (Clone IM7, eBioscience, San Diego, CA), anti-mouse IFN $\gamma$  PE (Clone XM G1.2, eBioscience, San Diego, CA), anti-mouse IL10 APC (Clone JES5-16E3, Biolegend, San Diego, CA), anti-human/mouse Granzyme B PerCP-Cy5.5 (Clone QA16A02, Biolegend, San Diego, CA). LIVE/DEAD™ Fixable Violet Dead Cell Stain Kit for 405 nm excitation (Invitrogen™, Thermo Fisher Scientific).

**Supplementary Figure 1: Representative flow cytometry gating strategy for blood-derived leukocytes in mice**

(A) Lymphocytes are set in forward angle (FSC) versus right angle scatter (SSC). For selecting CD39<sup>+</sup> and CD39<sup>-</sup> cells histogram dot plots are used after gating for CD8<sup>+</sup> cells. (B) Representative dot plots for CD39<sup>-</sup>CD73<sup>+</sup>, CD39<sup>+</sup>CD73<sup>+</sup> and CD39<sup>+</sup>CD73<sup>-</sup> cells are shown for control (untreated) and MT treated mouse. Additionally, unstained controls are displayed for CD39 and CD73 staining. (C) Representative dot plots for Tim-3<sup>+</sup>, PD-1<sup>+</sup>Tim-3<sup>+</sup> and PD-1<sup>+</sup> cells are shown for control and MT treated mouse. Additionally, unstained controls are displayed for PD-1 and Tim-3 staining (D-E) To analyze the frequency of Granzyme B<sup>+</sup> cells and IL-10<sup>+</sup> cells, CD8 expressing cells were set in a Granzyme B or IL-10 versus CD8 staining.

**Supplementary Figure 2: Representative flow cytometry gating strategy for lung-derived leukocytes in mice**

(A) Lymphocyte populations are selected in forward angle (FSC) versus right angle scatter (SSC). For identifying CD39<sup>+</sup> and CD39<sup>-</sup> cells histogram dot plots are used after gating for CD8<sup>+</sup> cells. (B) Representative dot plots for CD39<sup>-</sup>CD73<sup>+</sup>, CD39<sup>+</sup>CD73<sup>+</sup> and CD39<sup>+</sup>CD73<sup>-</sup> cells and (C) for Tim-3<sup>+</sup>, PD-1<sup>+</sup>Tim-3<sup>+</sup> and PD-1<sup>+</sup> cells are shown for control (untreated) and MT treated mice. (D-E) The frequencies of Granzyme B<sup>+</sup> CD8<sup>+</sup> cells and IL-10<sup>+</sup> CD8<sup>+</sup> cells are displayed for control and MT treated mouse.

**Supplementary Figure 3: Effect of intact whole mitochondria on CD8<sup>+</sup> T cells *in vitro*.**

(A) ROS production and ATP release from extracellular mitochondria isolated from mouse hepatocytes are visualized using fluorescent dye MitoSOX<sup>TM</sup> and ATP probe 2-2 Zn (×100 objective; scale bar, 10 μm) before and after addition of succinate (20 mM). (B-C) The phenotype of CD8<sup>+</sup> T cells was assessed before and after addition of CD3/CD28 Dynabeads, in the absence (Control) or presence of adenosine (ADO) (50 μM), ATP (1mM) and mitochondria (MT) (50 μg/ml) for 24 hours. (B) Percentages of Granzyme B<sup>+</sup> cells within CD8<sup>+</sup>CD39<sup>+</sup> cells are shown. Mean± SEM frequency of IFN $\gamma$  (C), Tim-3<sup>+</sup> (D) and PD-1<sup>+</sup> (E) within CD8<sup>+</sup> cells are displayed. (F) Frequency of CTLA-4<sup>+</sup> cells within blood derived CD8<sup>+</sup> T cells in control (untreated) and MT treated mice is represented. P value calculated by Kruskal–Wallis tests followed by Dunn's multiple comparisons. \* p < 0.05.

**Supplementary Figure 4: Mitochondria and bacteria cause lung injury with loss of CD8<sup>+</sup> T cells and accumulation of pro-inflammatory immune cells.**

(A) Alveolar cells were obtained from mitochondria (MT, n=7), mitochondria and bacteria (MT+BAC, n=8) and bacteria (BAC, n=8) treated mice and stained for flow cytometry analysis. Mean± SEM frequency of CD11b<sup>+</sup>, Ly6G<sup>+</sup>, CD4<sup>+</sup> and CD8<sup>+</sup> cells within lung derived CD45<sup>+</sup> cells are shown. (B-C) Representative images of immunohistochemical

staining of Ly6G neutrophils (B) and CD8 cells (C) in lung sections obtained from untreated (control) and MT, BAC and MT+BAC treated wild type mice ( $\times 20$ , scale bar: 100  $\mu\text{m}$ ). P value obtained using Kruskal–Wallis tests followed by Dunn’s multiple comparisons. \*\*  $p < 0.01$ .

### **Supplementary Figure 5: Mitochondria and bacteria induce Granzyme B<sup>+</sup> and decrease IL-10<sup>+</sup> production in lung derived CD39<sup>+</sup> CD8<sup>+</sup> T cell subsets.**

Mice were untreated (controls,  $n=4$ ), or treated with MT ( $n=7$ ), MT+ BAC ( $n=8$ ) and BAC ( $n=8$ ). Lung derived CD8<sup>+</sup> T cells obtained from these mice, were subdivided into CD39<sup>+</sup> and CD39<sup>-</sup> subpopulations. (A, B) Frequencies of Granzyme B<sup>+</sup> cells are represented within lung derived CD39<sup>+</sup>CD8<sup>+</sup> and CD39<sup>-</sup>CD8<sup>+</sup> lymphocytes. (C, D) Percentage of IL10<sup>+</sup> producing cells within CD39<sup>+</sup>CD8<sup>+</sup> and CD39<sup>-</sup>CD8<sup>+</sup> cells are shown. (E, F) Frequency of PD-1<sup>+</sup>Tim-3<sup>+</sup> cells among CD39<sup>+</sup>CD8<sup>+</sup> and CD39<sup>-</sup>CD8<sup>+</sup> cells. Data represent mean  $\pm$  SEM. P value obtained using Kruskal–Wallis tests followed by Dunn’s multiple comparisons. \*  $p < 0.05$ ; \*\*  $p < 0.01$ .

### **Supplementary Figure 6: Characterization of CD8 T cell phenotype in trauma patients.**

Frequencies of CD39<sup>-</sup>CD73<sup>+</sup> (A) and CD39<sup>+</sup>CD73<sup>+</sup> (B) within circulating CD8<sup>+</sup> T cells in controls ( $n=10$ ) and trauma patients ( $n=10$  per group). (B) Circulating levels of mitochondrial DNA (fg/ $\mu\text{L}$ ) in controls and trauma patients at day 0/1 and day 2/3. Frequencies of PD-1<sup>+</sup>Tim-3<sup>+</sup> cells within CD8<sup>+</sup> cells (D) and CD39<sup>-</sup>CD8<sup>+</sup> cells (E) in controls and trauma patients. Percentages of PD-1<sup>+</sup>Tim-3<sup>+</sup> cells within CD39<sup>+</sup>CD8<sup>+</sup> (F) and CD39<sup>-</sup>CD8<sup>+</sup> lymphocytes (G) are shown. Frequencies of Granzyme B<sup>+</sup> cells within CD39<sup>+</sup>CD8<sup>+</sup> (H) and CD39<sup>-</sup>CD8<sup>+</sup> lymphocytes (I) are displayed. Data represent mean  $\pm$  SEM. P value obtained using Kruskal–Wallis tests followed by Dunn’s multiple comparisons. \*\*  $p < 0.01$ .

### **Supplementary Video 1: MitoTracker™ staining following addition of CCCP, exogenous ATP and apyrase**

Freshly isolated liver derived mitochondria were stained with MitoTracker™ and were imaged by video fluorescence microscopy. Uncoupling agent CCCP (10µM) was added after 10 sec. 100x oil objective, frame rate: 10 frame per 1 sec.

**Supplementary Video 2: ATP Probe staining following addition of CCCP, exogenous ATP and apyrase**

ATP release from freshly isolated liver derived mitochondria were imaged by using ATP probe 2-2 Zn and recorded by video microscopy following addition of 10µM CCCP (10 sec), exogenous 1mM ATP (50 sec) and 10 U/ml apyrase (70 sec). 100x oil objective, frame rate: 10 frame per 1 sec.

**Supplementary Video 3: MitoSOX™ staining after addition of succinate**

Liver derived mitochondria were visualized with MitoSOX™ and after addition of 20 mM succinate (11 sec). 100x oil objective, frame rate: 10 frame per 1 sec.

**Supplementary Video 4: ATP Probe staining after addition of succinate**

ATP release was monitored by video fluorescence microscopy following treatment with 20 mM succinate (12 sec). 100x oil objective, frame rate: 10 frame per 1 sec.
